# Supplementary material for: Early downregulation of Mcl-1 regulates apoptosis triggered by cardiac glycoside UNBS1450
Source: PubMed Central journal article supplement (PMC4669823; doi:10.1038/cddis.2015.134), 2015-06-11

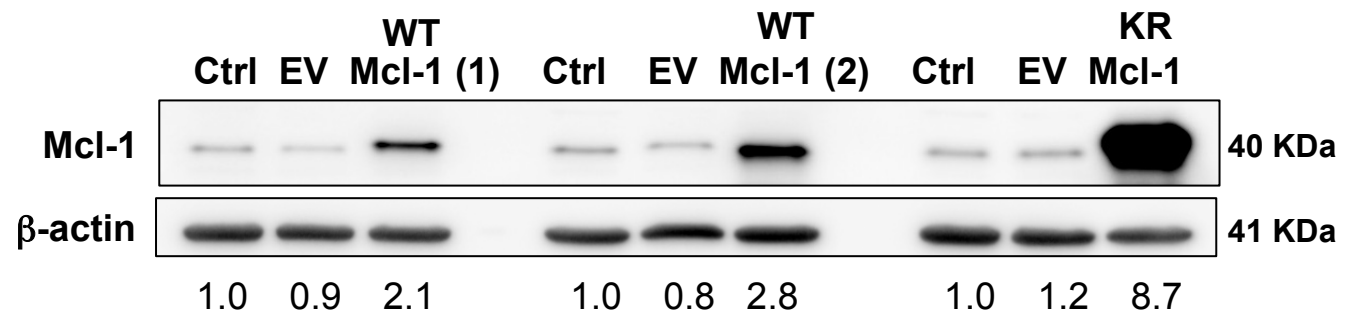

**Supplementary Figure 1**

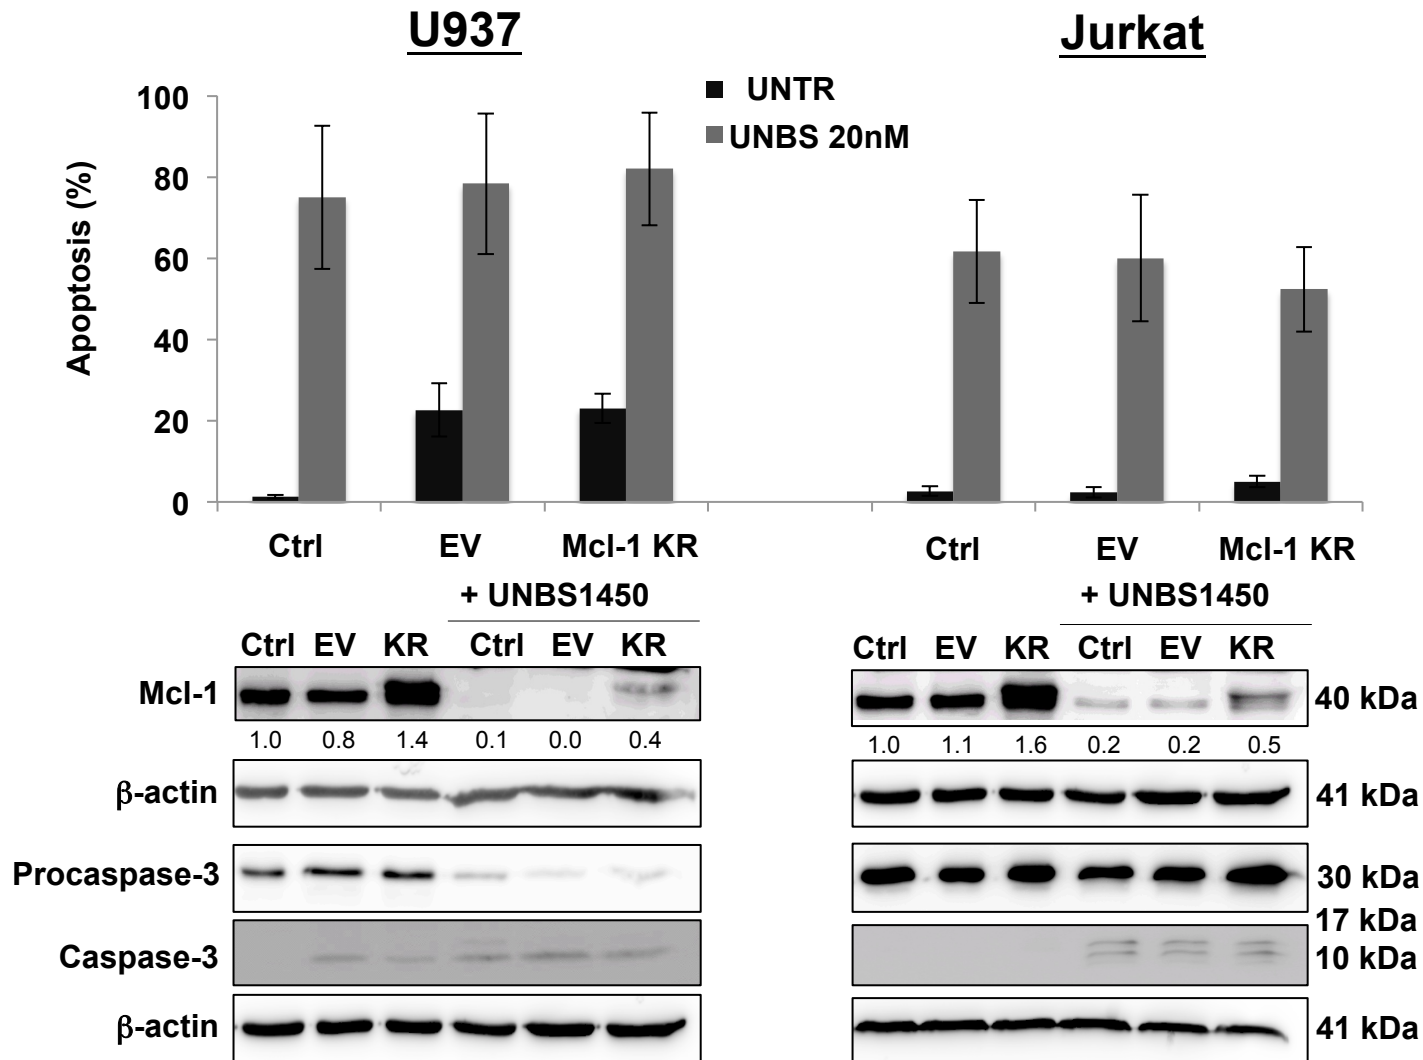

Supplementary Figure 2

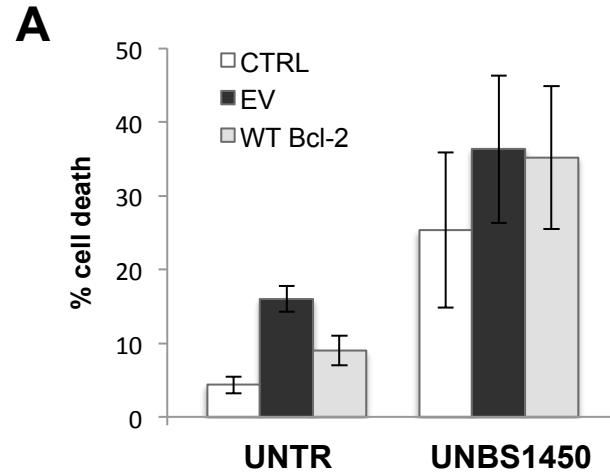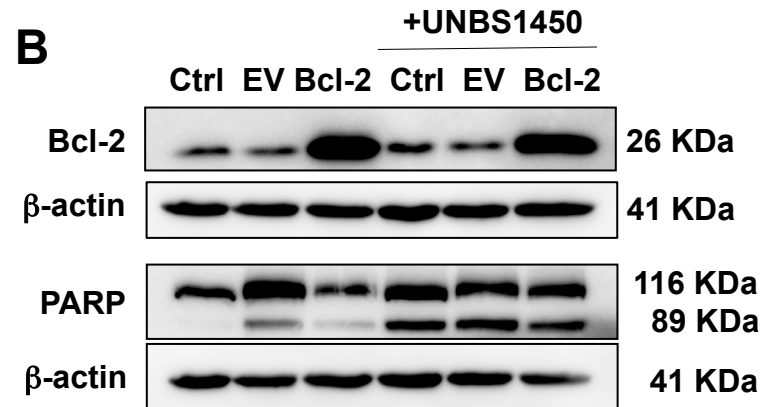

Supplement: cddis2015134x1.pdf [file cddis2015134x1.pdf]
